# Supplementary material
Source: PubMed Central journal article supplement (PMC8028641)
Supplement: BPA-28-822-s001.pdf [file BPA-28-822-s001.pdf]

## Online-only section – Supplemental data

### I. eTables

1. eTable 1. Overview of the scored cardio- and cerebrovascular risk factors.
2. eTable 2. Overview of the additional clinical investigations in carriers of 1 pathogenic *ABCC6* variant and PXE patients in the multigenerational family.
3. eTable 3. Variant classification data.
4. eTable 4. Logistic regression analysis for cardiovascular risk factors as modifiers for *ABCC6* variant-stroke interaction.
5. eTable 5. Associated anomalies on cerebral imaging in the 16 stroke patients of the independent patient cohort carrying a pathogenic *ABCC6* variant.

### II. eFigures

1. eFigure 1. Splice site effect prediction for *ABCC6* variant c.4208+9G>A.

### III. eReferences

## I. eTables

**eTable1. Overview of the scored cardio- and cerebrovascular risk factors.** BMI: body mass index, HDL: high-density lipoprotein, LDL: low-density lipoprotein.

|                                 | <b>Used Cut-off values</b>                                                     | <b>References</b> |
|---------------------------------|--------------------------------------------------------------------------------|-------------------|
| <b>Hypertension</b>             | >140/90 mmHg                                                                   | (5)               |
| <b>Excessive alcohol use</b>    | - >3/4 units/day or<br>- > 7/14 units/week<br>(female/male)                    | (4,13)            |
| <b>Tobacco use</b>              | - currently smoking<br>- quit smoking less than 10 years ago<br>- never smoked | (2)               |
| <b>Weight</b>                   | - BMI >25: overweight<br>- BMI>30: obesity                                     | (12)              |
| <b>Diabetes mellitus</b>        | glycemia >126mg/dL                                                             | (1,6)             |
| <b>Hypercholesterolemia</b>     | >190 mg/dL                                                                     | (8)               |
| <b>Hypertriglyceridemia</b>     | laboratory dependent                                                           | (8)               |
| <b>Hypercholesterolemia HDL</b> | laboratory dependent                                                           | (8)               |
| <b>Hypercholesterolemia LDL</b> | laboratory dependent                                                           | (8)               |

**eTable 2. Overview of the additional clinical investigations in carriers of 1 pathogenic *ABCC6* variant and PXE patients in the multigenerational family.** Calcification of the carotids and arteries of the lower limbs did not have a functional impact in affected patients. *ABCC6*: ATP-binding cassette subfamily C member 6, AS: angioid streaks, F: female, M: male, NA: not applicable, Pd'O: peau d'orange.

| Patient code                        | III-3                           | IV-2         | IV-17                 | IV-19                                       | IV-22                     | IV-23                              | IV-24  | IV-30               | IV-11  | IV-12  |
|-------------------------------------|---------------------------------|--------------|-----------------------|---------------------------------------------|---------------------------|------------------------------------|--------|---------------------|--------|--------|
| Age (years)                         | 69                              | 50           | 62                    | 59                                          | 53                        | 52                                 | 47     | 45                  | 34     | 35     |
| Sex                                 | M                               | F            | M                     | F                                           | F                         | M                                  | M      | M                   | F      | M      |
| Echocardiography                    | abnormal                        | abnormal     | abnormal              | abnormal                                    | abnormal                  | abnormal                           | normal | abnormal            | normal | normal |
| Left ventricle morphology           | sigmoid septum (bottom)         | normal       | concentric remodeling | decreased relative thickness ventricle wall | normal                    | normal                             | normal | dilated (eutrophic) | normal | normal |
| Left ventricle - diastolic function | dysfunction                     | dysfunction  | normal                | normal                                      | normal                    | dysfunction                        | normal | dysfunction         | normal | normal |
| Left atrium morphology              | normal                          | normal       | normal                | normal                                      | normal                    | normal                             | normal | dilated atrium      | normal | normal |
| Valvopathy – mitral valve           | posterior annulus calcification | normal       | normal                | degeneration without dysfunction            | bulging posterior leaflet | normal                             | normal | prolapse            | normal | normal |
| Valvopathy – aortic valve           | normal                          | normal       | sclerosis             | normal                                      | normal                    | normal                             | normal | normal              | normal | normal |
| Aortic anomalies                    | no                              | no           | no                    | no                                          | no                        | dilated sinus aorta (z-score 2.95) | no     | no                  | no     | no     |
| Internal calcifications             | no                              | no           | liver                 | no                                          | kidney                    | no                                 | no     | gall bladder        | no     | kidney |
| Intestinal cysts                    | no                              | gall bladder | no                    | liver                                       | no                        | no                                 | no     | no                  | no     | no     |

| <b>Patient code</b>                       | <b>III-3</b> | <b>IV-2</b> | <b>IV-17</b> | <b>IV-19</b> | <b>IV-22</b> | <b>IV-23</b> | <b>IV-24</b> | <b>IV-30</b> | <b>IV-11</b>                    | <b>IV-12</b>                    |
|-------------------------------------------|--------------|-------------|--------------|--------------|--------------|--------------|--------------|--------------|---------------------------------|---------------------------------|
| <b>Testicular microlithiasis</b>          | no           | NA          | no           | NA           | NA           | no           | no           | no           | NA                              | yes                             |
| <b>Carotid calcification</b>              | yes          | no          | no           | no           | no           | yes          | no           | no           | no                              | no                              |
| <b>Calcification arteries lower limbs</b> | yes          | no          | yes          | no           | no           | no           | yes          | no           | yes                             | yes                             |
| <b>Retinopathy</b>                        | no           | no          | no           | comets       | comets       | no           | comets       | no           | bilateral AS and Pd'O           | bilateral AS and Pd'O           |
| <b>Cutaneous signs</b>                    | absent       | absent      | absent       | absent       | absent       | absent       | absent       | absent       | Yellowish skin papules/ plaques | Yellowish skin papules/ plaques |

**eTable3. Variant classification data.** For each of the mentioned variants, variant classification was performed, taking into account Clinvar and literature data on pathogenicity of the variant, the frequency of the variant in the non-Finnish European population on the gnomAD database, *in silico* pathogenicity prediction tools Align GVGD, SIFT, Mutation taster and Polyphen-2, and conservation of the variant in 5 vertebrate species (Homo sapiens, Pan troglodytes, Mus musculus, Rattus norvegicus, Danio rerio). B: benign, Cons: conservation, D: deleterious, DC: disease causing, E: exon, id: identifier, MT: mutation taster, P: polymorphism, PoD: possibly damaging, PrD: probably damaging, T: tolerated.

| gDNA     | cDNA        | Protein             | E  | Variant id | Clinvar                        | Gnomad  | Align GVGD                                                     | SIFT | MT | Polyphen-2 | Cons             | Pathogenic in literature            |
|----------|-------------|---------------------|----|------------|--------------------------------|---------|----------------------------------------------------------------|------|----|------------|------------------|-------------------------------------|
| 16295863 | c.1171A>G   | p.(Arg391Gly)       | 9  | rs72653762 | likely pathogenic <sup>a</sup> | 0.79%   | C15                                                            | D    | DC | PrD        | 5/5              | (2)                                 |
| 16282828 | c.1639G>A   | p.(Ala547Thr)       | 13 | rs56877937 | /                              | 0.017%  | C0                                                             | D    | DC | PoD        | 5/5              | /                                   |
| 16251531 | c.3871G>A   | p.(Ala1291Thr)      | 27 | rs58694313 | conflicting <sup>b</sup>       | 0.029%  | C0                                                             | T    | P  | B          | 4/5 <sup>f</sup> | (9)                                 |
| 16248792 | c.3979G>A   | p.(Gly1327Arg)      | 28 | rs79536709 | /                              | 0.025%  | C0                                                             | D    | DC | PrD        | 5/5              | /                                   |
| 16248737 | c.4034T>C   | p.(Ile1345Thr)      | 28 | /          | /                              | /       | C65                                                            | D    | DC | PrD        | 5/5              | /                                   |
| 16248611 | c.4082A>G   | p.(Asp1361Gly)      | 29 | /          | /                              | /       | C65                                                            | D    | DC | PrD        | 5/5              | other variant same position (10,11) |
| 16248589 | c.4104delC  | p.Asp1368Glu fs*35) | 29 | rs72664237 | pathogenic <sup>c</sup>        | 0.0040% | /                                                              | /    | /  | /          | 5/5              | (7)                                 |
| 16248566 | c.4127A>C   | p.(Glu1376Ala)      | 29 | /          | /                              | /       | C35                                                            | D    | DC | PoD        | 5/5              | /                                   |
| 16248566 | c.4127A>G   | p.(Glu1376Gly)      | 29 | /          | /                              | /       | C35                                                            | D    | DC | PrD        | 5/5              | /                                   |
| 16248525 | c.4168C>G   | p.(Gln1390Glu)      | 29 | /          | /                              | /       | C0                                                             | T    | DC | PrD        | 4/5 <sup>f</sup> | /                                   |
| 16248495 | c.4198G>A   | p.(Glu1400Lys)      | 29 | rs63751241 | pathogenic <sup>d</sup>        | 0.001%  | C0                                                             | T    | DC | PrD        | 3/5 <sup>g</sup> | (2)                                 |
| 16248476 | c.4208+9G>A | p.?                 | 29 | rs58760581 | pathogenic <sup>e</sup>        | 1.62%   | splice site prediction: no significant alterations (eFigure 1) |      |    |            |                  | /                                   |

a: clinvar record RCV000256117.1; b: clinvar records SCV000589081.1, SCV000515882.2; c: clinvar records SCV000589109.1, SCV000598672.1; d: clinvar record SCV000589112.1; e: clinvar record SCV000589158.1; f: not Danio rerio; g: not Mus musculus, Rattus norvegicus.

**eTable 4. Logistic regression analysis for cardiovascular risk factors as modifiers for *ABCC6* variant-stroke interaction.** CI: confidence interval, OR: odds ratio.

|                          | Chi square | Regression coefficient | Standard error | p-value | OR (95% CI)          |
|--------------------------|------------|------------------------|----------------|---------|----------------------|
| <b>Tobacco use</b>       | 0.689      | 0.701                  | 0.782          | 0.370   | 2.016 (0.436-9.330)  |
| <b>Hypertension</b>      | 3.650      | -1.005                 | 0.548          | 0.067   | 0.3660 (0.125-1.072) |
| <b>Diabetes mellitus</b> | 0.104      | 0.215                  | 0.655          | 0.742   | 1.242 (0.344-4.476)  |
| <b>Dyslipidemia</b>      | 0.099      | -0.172                 | 0.549          | 0.755   | 0.842 (0.287-2.472)  |

**eTable 5. Associated anomalies on cerebral imaging in the 16 stroke patients of the independent patient cohort carrying a pathogenic *ABCC6* variant.** CP: Choroid plexus; FC: Falx cerebri; GP: Glandula pinealis; Id: patient identifier, PVL: Periventricular leukomalacia; SOC: Semioval center.

| Id  | White matter lesions        | Intracerebral calcifications | Vascular malformations | Vascular calcifications |
|-----|-----------------------------|------------------------------|------------------------|-------------------------|
| 006 | PVL                         | GP, CP                       | /                      | /                       |
| 026 | PVL, bilateral in SOC       | GP, CP, FC                   | /                      | /                       |
| 035 | Bilateral frontoparietal    | /                            | /                      | /                       |
| 037 | PVL, SOC                    | /                            | /                      | /                       |
| 065 | /                           | /                            | /                      | /                       |
| 088 | 1 lesion left parietal lobe | /                            | /                      | /                       |
| 098 | PVL                         | GP, CP                       | /                      | /                       |
| 135 | /                           | /                            | /                      | /                       |
| 143 | /                           | /                            | /                      | /                       |
| 146 | /                           | /                            | /                      | Carotid artery siphon   |
| 166 | /                           | /                            | /                      | /                       |
| 193 | /                           | /                            | /                      | /                       |
| 236 | /                           | /                            | /                      | /                       |
| 249 | /                           | /                            | /                      | /                       |
| 305 | Bilateral frontoparietal    | /                            | /                      | /                       |
| 382 | /                           | /                            | /                      | /                       |

II. eFigures  
 eFigure 1. Splice site effect prediction for *ABCC6* variant c.4208+9G>A.

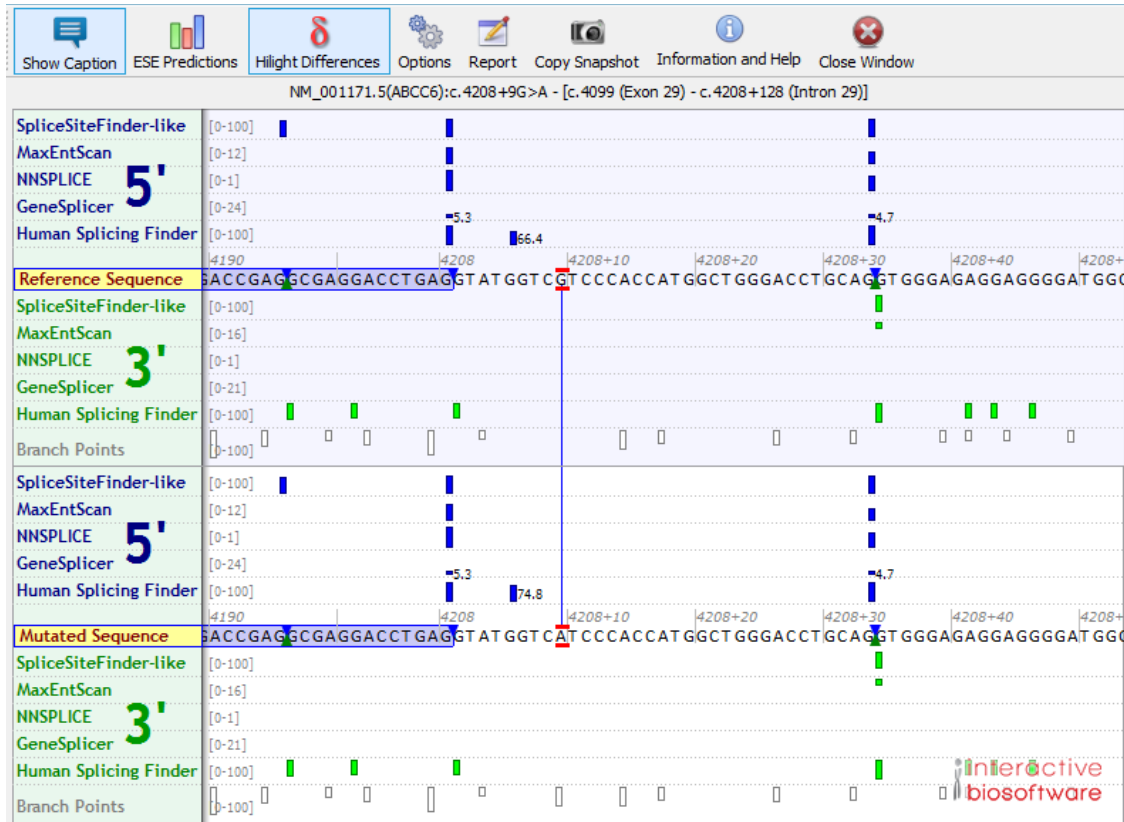

### III. eReferences

- [1] Almdal T, Scharling H, Jensen JS, Vestergaard H (2004) The independent effect of type 2 diabetes mellitus on ischemic heart disease, stroke, and death: a population-based study of 13,000 men and women with 20 years of follow-up. *Arch Intern Med* 12;164(13):1422–6.
- [2] Chassaing N, Martin L, Mazereeuw J, Barrié L, Nizard S, Bonafé J-L, Calvas P, Hovnanian A (2004) Novel ABCC6 mutations in pseudoxanthoma elasticum. *J Invest Dermatol* 122(3):608–13.
- [3] Eckel RH, York DA, Rössner S, Hubbard V, Caterson I, St Jeor ST, Hayman LL, Mullis RM, Blair SN, American Heart Association (2004) Prevention Conference VII: Obesity, a worldwide epidemic related to heart disease and stroke: executive summary. *Circulation* 2;110(18):2968-75.
- [4] Friedmann PD, Saitz R, Gogineni A, Zhang JX, Stein MD (2001) Validation of the screening strategy in the NIAAA "Physicians' Guide to Helping Patients with Alcohol Problems". *J Stud Alcohol* 62(2):234–8.
- [5] James PA, Oparil S, Carter BL, Cushman WC, Dennison-Himmelfarb C, Handler J, Lackland DT, LeFevre ML, MacKenzie TD, Ogedegbe O, Smith SC, Svetkey LP, Taler SJ, Townsend RR, Wright JT, Narva AS, Ortiz E (2014) 2014 evidence-based guideline for the management of high blood pressure in adults: report from the panel members appointed to the Eighth Joint National Committee (JNC 8). *JAMA* 5;311(5):507-20.
- [6] Kannel WB, McGee DL (1979) Diabetes and cardiovascular risk factors: the Framingham study. *Circulation* 59(1):8–13.
- [7] Le Saux O, Beck K, Sachsinger C, Silvestri C, Treiber C, Goring HH, Johnson EW, de Paepe A, Pope FM, Pasquali-Ronchetti I, Bercovitch L, Marais AS, Viljoen DL, Terry SF, Boyd CD (2001) A spectrum of ABCC6 mutations is responsible for pseudoxanthoma elasticum. *Am J Hum Genet* 69(4):749–64.
- [8] National Cholesterol Education Program (NCEP) Expert Panel on Detection, Evaluation, and Treatment of High Blood Cholesterol in Adults (Adult Treatment Panel III) (2002) Third Report of the National Cholesterol Education Program (NCEP) Expert Panel on Detection, Evaluation, and Treatment of High Blood Cholesterol in Adults (Adult Treatment Panel III) final report. *Circulation* 17;106(25):3143-421
- [9] Plomp AS, Florijn RJ, Brink Ten J, Castle B, Kingston H, Martín-Santiago A, Gorgels TGMF, de Jong PTVM, Bergen AAB (2008) ABCC6 mutations in pseudoxanthoma elasticum: an update including eight novel ones. *Mol Vis.* 2008 24;14:118–24.
- [10] Pulkkinen L, Nakano A, Ringpfeil F, Uitto J (2001) Identification of ABCC6 pseudogenes on human chromosome 16p: implications for mutation detection in pseudoxanthoma elasticum. *Hum Genet* 109(3):356–65.
- [11] Uitto J, Pulkkinen L, Ringpfeil F (2001) Molecular genetics of pseudoxanthoma elasticum: a metabolic disorder at the environment-genome interface? *Trends Mol Med* 7(1):13–17.
- [12] Wilson PWF, Bozeman SR, Burton TM, Hoaglin DC, Ben-Joseph R, Pashos CL (2008) Prediction of first events of coronary heart disease and stroke with consideration of adiposity. *Circulation* 8;118(2):124–30.
- [13] Yusuf S, Hawken S, Ounpuu S, Dans T, Avezum A, Lanas F, McQueen M, Budaj A, Pais P, Varigos J, Lisheng L, INTERHEART Study Investigators (2004) Effect of potentially modifiable risk factors associated with myocardial infarction in 52 countries (the INTERHEART study): case-control study. *Lancet Sep*;364(9438):937–52.
